# Supplementary material
Source: HighWire-hosted journal article supplement (https://www.haematologica.org/content/suppl/2013/02/28/haematol.2012.069260)
Supplement: 2012.069260.WINKLER_SUPPL.pdf [file 2012.069260.WINKLER_SUPPL.pdf]

Haematologica


  


Open access journal of the Ferrata-Storti Foundation, a non-profit organization

Open access journal of the Ferrata-Storti Foundation, a non-profit organization

- Home
- Current Issue
- Early view
- Review Series
- Archive
- About Us

  About Hematologica

  Editorial Team

  Our Policies
- Contact

  Advertising

  Rights & Permissions
- Submit a Manuscript

  Author Guidelines

  Reviewer Guidelines

  Submit a manuscript

  Track a Manuscript

Open access journal of the Ferrata-Storti Foundation, a non-profit organization

CURRENT ISSUE

##### May, 2024

No.
109
(5)

- TABLE OF CONTENTS
- DOWNLOAD THE ISSUE

2022 CiteScore: 13.3
2022 Impact Factor: 10.1

×

##### May, 2024

No. 109 (5)

Loading...

Loading...

EDITOR'S PICKS

##### Article

#### Differential transcriptional control of hematopoiesis in congenital and cyclic neutropenia patients harboring *ELANE* mutations

Alexander
Zeidler
et al.

##### Article

#### Factors associated with refractoriness or early progression after idecabtagene vicleucel in patients with relapsed/ refractory multiple myeloma: US Myeloma Immunotherapy Consortium real world experience

Hamza
Hashmi
et al.

##### Review Article

#### Emicizumab: the hemophilia A game-changer

Pedro E.
Alcedo Andrade
et al.

##### Article

#### Impact of inotuzumab ozogamicin on outcome in relapsed or refractory acute B-cell lymphoblastic leukemia patients prior to allogeneic hematopoietic stem cell transplantation and risk of sinusoidal obstruction syndrome/venous occlusive disease

Sabine
Kayser
et al.

##### Article

#### Effect of delayed cell infusion in patients with large B-cell lymphoma treated with chimeric antigen receptor T-cell therapy

Andrew P.
Jallouk
et al.

##### Letter

#### Deciphering the molecular complexity of the IKZF1plus genomic profile using Optical Genome Mapping

Jonathan L.
Lühmann
et al.

ARTICLES IN THREE SENTENCES

##### Article

#### Pharmacologic targeting of the p62 ZZ domain enhances both anti-tumor and bone-anabolic effects of bortezomib in multiple myeloma

Ways to increase the anti-multiple myeloma (MM) efficacy of proteasome inhibitors (PI) are needed to improve therapeutic responses, disease-free survival, and bone health in MM patients. Through in vitro and in vivo experiments, Marino and colleagues studied the activity of a small molecule ligand of the ZZ-domain, XRK3F2, that decreased osteoclast formation and activity, and reversed MM-epigenetic suppression of osteoblast differentiation. They showed that XRK3F2 boosts both the anti-tumor and bone-anabolic effects of PI and provide a strong rationale for developing a new therapeutic regimen based on co-administration of XRK3F2 and bortezomib to treat MM.

Silvia
Marino
et al.

##### Letter

#### Acute myeloid leukemia-driven IL-3-dependent upregulation of BCL2 in non-malignant hematopoietic stem and progenitor cells increases venetoclax-induced cytopenias

Venetoclax-containing regimens, which are standard of care for unfit patients with acute myeloid leukemia (AML), are associated with high incidences of clinically relevant cytopenias. The underlying cause of these cytopenias is unexplained, and the lack of venetoclax effect on BCL2 expression in mature hematopoietic lineages suggests that the observed cytopenias are driven by changes in non-malignant hematopoietic stem and progenitor cells (HSPC). With their research, Fowler-Shorten and colleagues show that AML induces an IL-3-dependent upregulation of BCL2 in HSPC, which in turn increases HSPC sensitivity to venetoclax and causes cytopenias.

Dominic J.
Fowler-Shorten
et al.

##### Article

#### Impaired hemoglobin clearance by sinusoidal endothelium promotes vaso-occlusion and liver injury in sickle cell disease

Recent evidence in sickle cell disease (SCD) suggests that liver sinusoidal endothelial cells (LSEC) support the tethering of damaged erythrocytes to hepatic sinusoids. Kaminski and colleagues performed an in-depth study of primary human LSEC in SCD through real-time intravital (in vivo) imaging in mice liver together with flow cytometric analysis and confocal imaging. They showed for the first time that liver injury in SCD is associated with accumulation of hemoglobin-S and iron in the LSEC, leading to senescence of these cells.

Tomasz W.
Kaminski
et al.

##### Letter

#### Rituximab plus cyclophosphamide and dexamethasone *versus* bortezomib plus cyclophosphamide and dexamethasone in newly diagnosed symptomatic Waldenström macroglobulinemia: a randomized controlled trial

Rituximab-based and bortezomib-based regimens have shown efficacy in the treatment of Waldenström macroglobulinemia (WM), a rare B-cell lymphoma. Xiong and colleagues present results of the randomized, controlled phase III trial comparing the activity of rituximab, cyclophosphamide, and dexamethasone (RCD) with that of bortezomib, cyclophosphamide, and dexamethasone (BCD) in newly diagnosed patients with WM. For the first time, they demonstrated that RCD is superior to BCD in terms of both progression-free and overall survival.

Wenjie
Xiong
et al.

TAKE ADVANTAGE FROM HAEMATOLOGICA

##### Easy first submission

Submit your manuscript without worries: we are flexible at first submission, all formats accepted.

LEARN MORE

##### Get immediate free access to all issues

GET NOW

##### Accepted manuscript published promptly

SUBMIT NOW

##### Get email alerts in advance

SUBSCRIBE NOW

##### Browse the Atlas for free

800 color images, 290 pages, 35 chapters

READ ATLAS ONLINE

##### Navigate

- Home
- Current issue
- Early view
- Archive
- About Haematologica
- Editorial Team
- Our policies

##### For Authors

- Author Guidelines
- Submit Manuscript
- Track Manuscript

##### For Reviewers

- Reviewer Guidelines
- Access Your Profile
- Access Your Tasks

##### For Advertisers

- Informations For Advertising

##### Education

- Review Articles
- Guidelines Articles

##### Privacy

- Cookie Policy
- Newsletter Privacy Policy
- Privacy Policy

##### More

- Rights & Permissions
- Web design
- Development

Copyright © 2023 by the Ferrata Storti Foundation | Web design ￫ | Development ￫

ISSN 0390-6078 print | ISSN 1592-8721 online
